# Supplementary material for: The Usefulness of a Duplex RT-qPCR during the Recent Yellow Fever Brazilian Epidemic: Surveillance of Vaccine Adverse Events, Epizootics and Vectors
Source: MDPI journal article supplement (doi:10.3390/pathogens10060693), 2021-06-03
Supplement: s1 [file s1]

**Supplementary Table.:YFV strains isolated in six Latin American countries and in the USA over 40 years**

| Strain ID    | Source Isolation | Specie                              | Year of isolation | Country   | YFV genotype | Genbank  |
|--------------|------------------|-------------------------------------|-------------------|-----------|--------------|----------|
| BEAN131      | Monkey           | Sentinel                            | 1955              | Brazil    | SA-I         | MW158338 |
| BeAN23536    | Monkey           | <i>Cebus sp.</i>                    | 1960              | Brazil    | SA-I         | MW158339 |
| BeAN142027   | Monkey           | <i>Saguinus midas</i>               | 1968              | Brazil    | SA-I         | MW158340 |
| BeAR233436   | Mosquito         | <i>Haemagogus sp.</i>               | 1973              | Brazil    | SA-I         | MW158343 |
| BeAR437159   | Mosquito         | <i>Haemagogus janthinomys</i>       | 1985              | Brazil    | SA-I         | MW158344 |
| BeAN510268   | Monkey           | <i>Alouatta sp.</i>                 | 1991              | Brazil    | SA-I         | MW158341 |
| BeH844801    | Human            | <i>Homo sapiens</i>                 | 2017              | Brazil    | SA-I         | MF370531 |
| BeH843297    | Human            | <i>Homo sapiens</i>                 | 2017              | Brazil    | SA-I         | MF370532 |
| BeH843301    | Human            | <i>Homo sapiens</i>                 | 2017              | Brazil    | SA-I         | MF370533 |
| OBS 5026     | Human            | <i>Homo sapiens</i>                 | 1997              | Ecuador   | 17DD         | MW158362 |
| OBS 2240     | Human            | <i>Homo sapiens</i>                 | 1995              | Peru      | SA-2         | MW158361 |
| IQT 5591     | Human            | <i>Homo sapiens</i>                 | 1998              | Peru      | SA-2         | MW158359 |
| IQD 8393     | Human            | <i>Homo sapiens</i>                 | 2004              | Peru      | 17DD         | MW158358 |
| MIS 1034     | Human            | <i>Homo sapiens</i>                 | 2011              | Peru      | 17DD         | MW158360 |
| CAREC889920  | Mosquito         | <i>Haemagogus janthinomys</i>       | 1988              | Trinidad  | SA-I         | MW158345 |
| CAREC890692  | Mosquito         | <i>Sabethes chloropterus</i>        | 1989              | Trinidad  | SA-I         | MW158346 |
| CAREC891954  | Monkey           | <i>Alouatta sp.</i>                 | 1989              | Trinidad  | SA-I         | MW158347 |
| CAREC9515207 | Mosquito         | <i>Haemagogus sp</i>                | 1995              | Trinidad  | SA-I         | MW158348 |
| TR 7856      | Mosquito         | <i>Mansonia titillans</i>           | 2008              | Trinidad  | SA-I         | MW158365 |
| TR 7796      | Mosquito         | <i>Coquillettidia venezuelensis</i> | 2009              | Trinidad  | SA-I         | MW158364 |
| TR 8183      | Mosquito         | <i>Culex (MeL) spissipes</i>        | 2009              | Trinidad  | SA-I         | MW158366 |
| TR 8194      | Mosquito         | <i>Coquillettidia venezuelensis</i> | 2009              | Trinidad  | SA-I         | MW158367 |
| P 16065      | Human            | <i>Homo sapiens</i>                 | 1966              | USA       | 17DD         | MW158363 |
| INHRR 1A-04  | Monkey           | <i>Alouatta seniculus</i>           | 2004              | Venezuela | SA-I         | MW158349 |
| INHRR 2A-04  | Monkey           | <i>Alouatta seniculus</i>           | 2004              | Venezuela | SA-I         | MW158350 |
| INHRR 3A-05  | Monkey           | <i>Alouatta seniculus</i>           | 2005              | Venezuela | SA-I         | MW158351 |
| INHRR 4A-05  | Monkey           | <i>Alouatta seniculus</i>           | 2005              | Venezuela | SA-I         | MW158352 |
| INHRR 5A-05  | Human            | <i>Homo sapiens</i>                 | 2005              | Venezuela | SA-I         | MW158353 |
| INHRR 6A-05  | Human            | <i>Homo sapiens</i>                 | 2005              | Venezuela | SA-I         | MW158354 |
| INHRR 8A-06  | Monkey           | <i>Alouatta seniculus</i>           | 2006              | Venezuela | SA-I         | MW158355 |
| INHRR 10A-10 | Monkey           | <i>Alouatta seniculus</i>           | 2010              | Venezuela | SA-I         | MW158357 |

Legend: SA-I = Southamerica genotype I; SA-II = Southamerica genotype II
